# Supplementary material for: GPR35-mediated Kynurenic Acid Sensing Acts as a Defender Against Gut Microbiota Disorder in Ulcerative Colitis
Source: Research Square preprint supplement (doi:10.21203/rs.3.rs-2162768/v1), 2022-10-17

**Supplementary Material**

**GPR35-mediated Kynurenic Acid** **Sensing** **Acts as a Defender Against Gut Microbiota Disorder in Ulcerative Colitis**

Di Wang1, †, Wenbao Wang2, †, Xue Bing1, Chenguang Xu1, Jiahua Qiu1, Jiangang Shen1, Jinwen Huang1, Junda, Li1 and Biao Xie1*

1 Department of Gastroenterology, People's Hospital of Longhua, Shenzhen 518109, P.R. China

2 College of Pharmacy, Qiqihar Medical University, Qiqihar, 161006, Heilongjiang, PR China

*Correspondence should be addressed to Biao Xie, Chief physician,

Department of Gastroenterology, People's Hospital of Longhua, NO.38 Jinglong Construction Road, Longhua District, Shenzhen 518109, China. Tel/Fax: +0755-27741585; E-mail: [xiebiaohxq@163.com](mailto:xiebiaohxq@163.com)

† These authors contributed equally to this work

**Figure S1** Schematic representation of rat disposal process in each group.


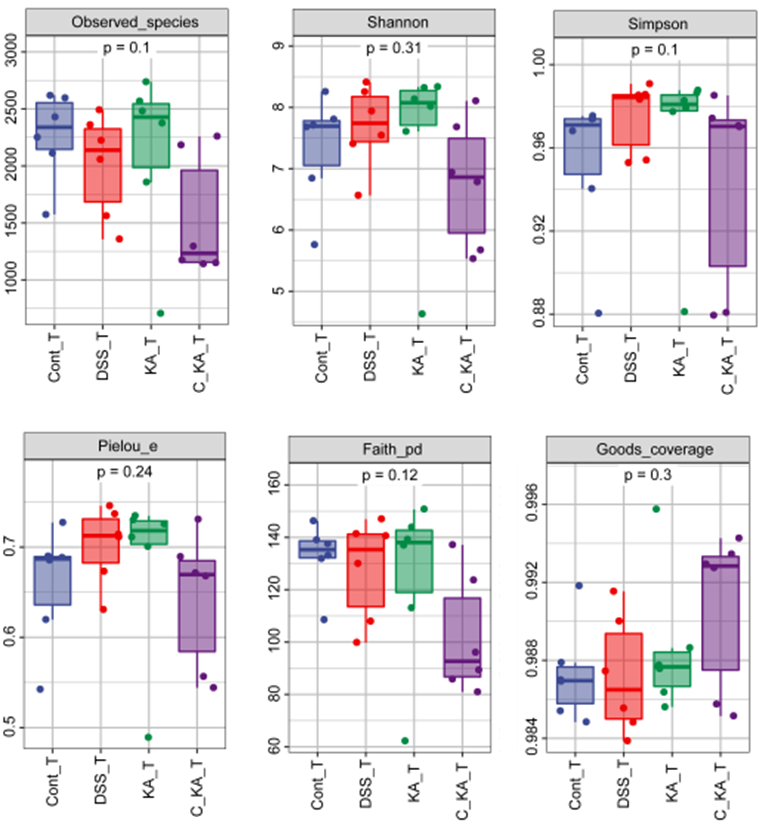


**Figure S2** α-diversity analysis of gut microbiota by Observed_species, Shannon, Simpson, Faith_pd, Goods_coverage and Pielou_e indexes.


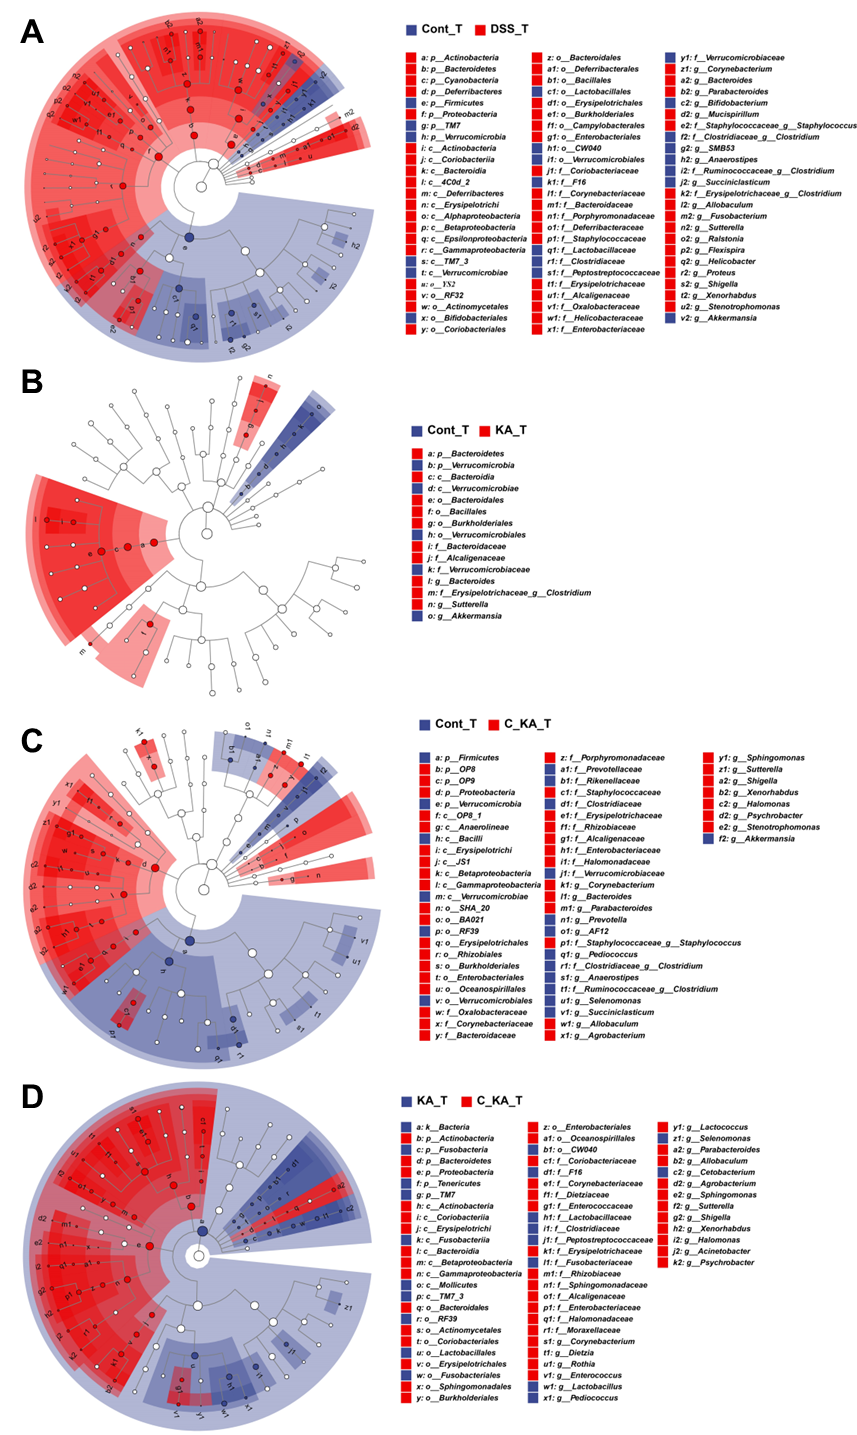


**Figure S3** The LEfSe analysis of the differential gut microbiome in Cont_T and DSS_T groups (A), Cont_T and KA_T groups (B), Cont_T and C_KA_T groups (C), KA_T and C_KA_T groups (D). The size of the circles was based on the relative abundance, the solid circle represented LDA > 3.0, *P* < 0.05, and the hollow circle represented *P* > 0.05.


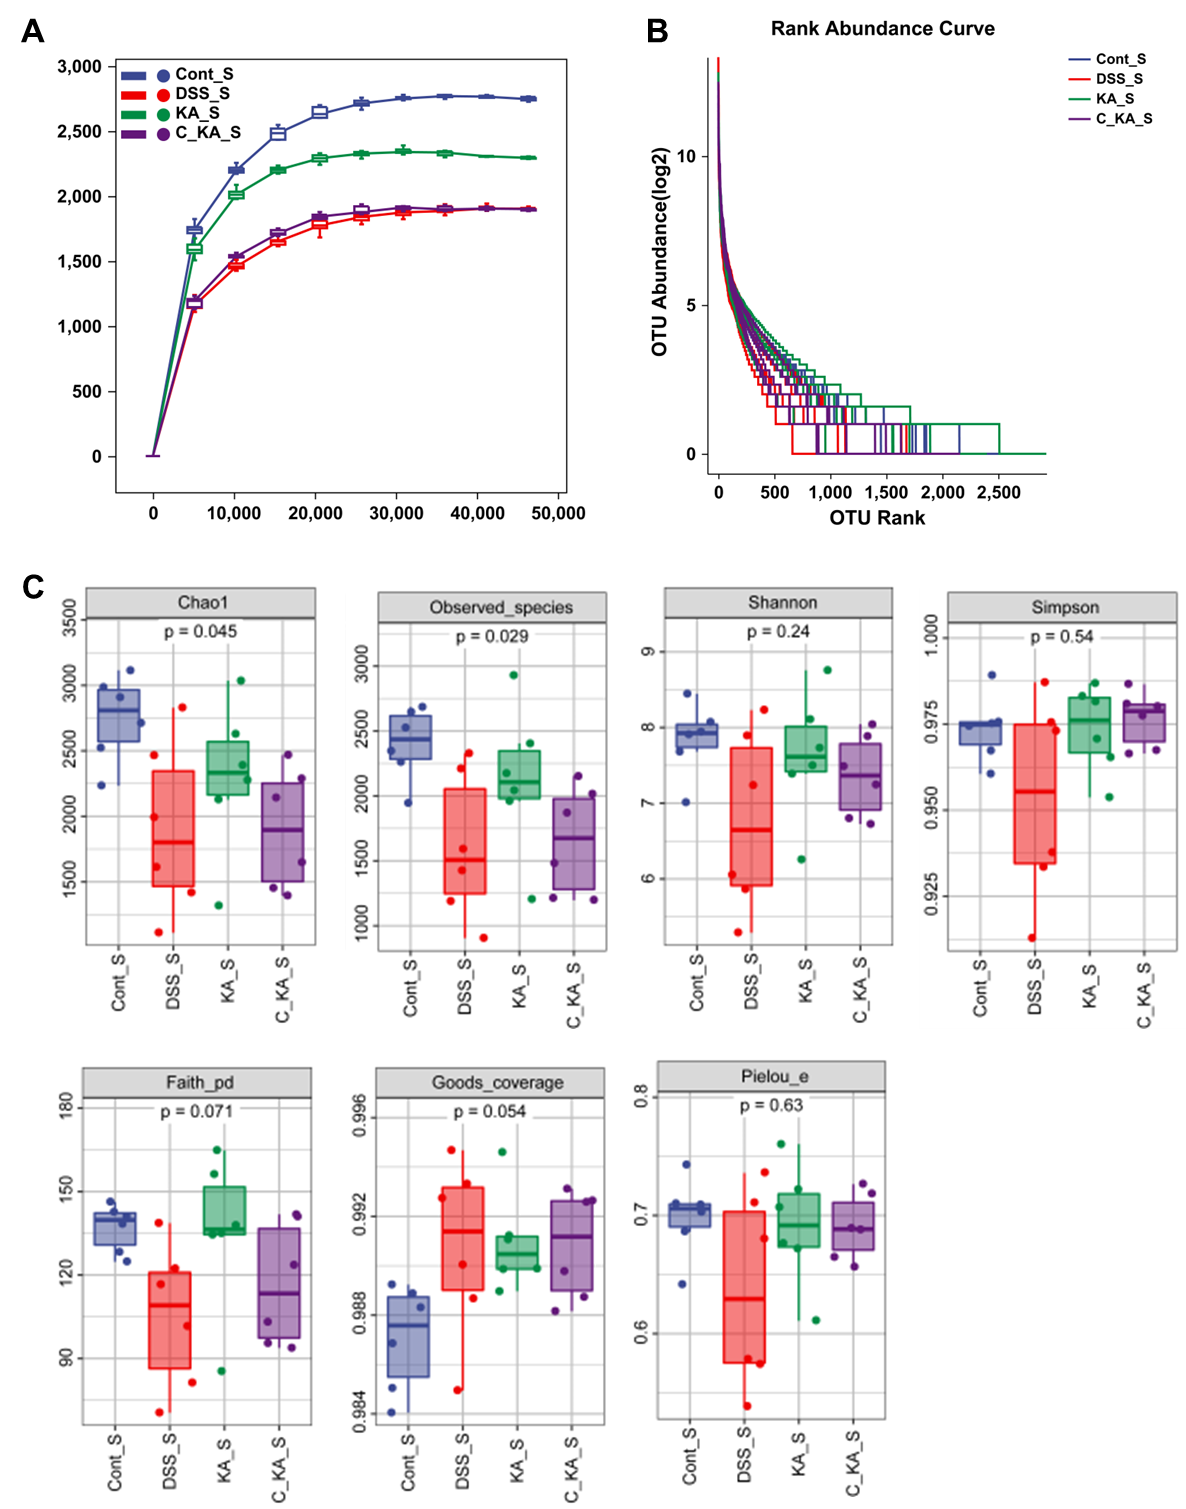


**Figure S4** (A, B) Rarefaction curve (A) and Rank abundance curve (B) of each group. (C) α-diversity analysis of gut microbiota by Chao1, Observed_species, Shannon, Simpson, Faith_pd, Goods_coverage and Pielou_e indexes.

**The** **raw unedited western blot images presented in Figure 1E**

p-ERK12 ERK12 *β*-actin


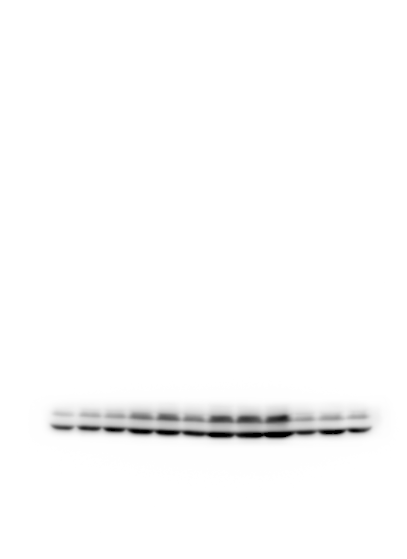

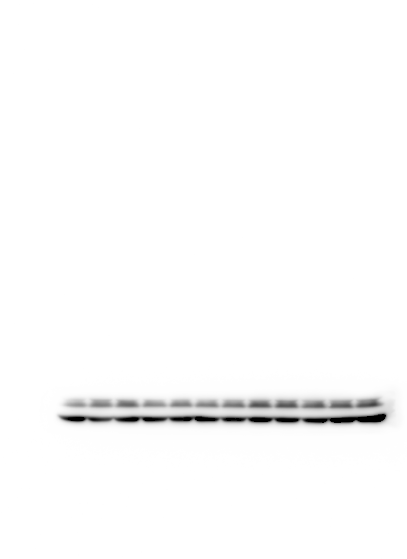

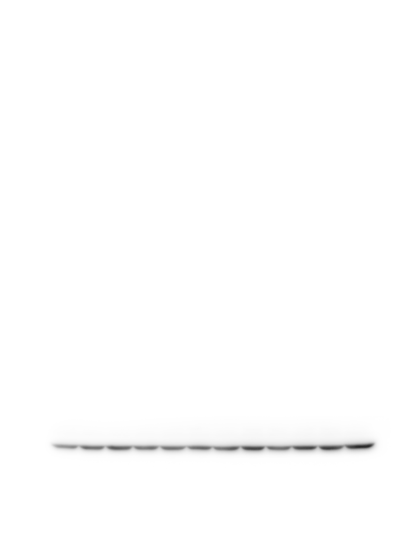


**The raw unedited western blot images presented in Figure 4E**

p-ERK12 ERK12 *β*-actin


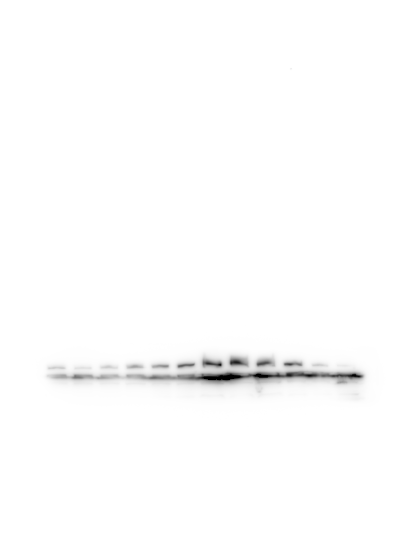

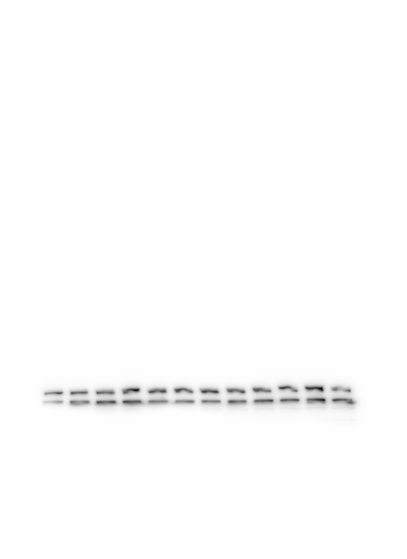

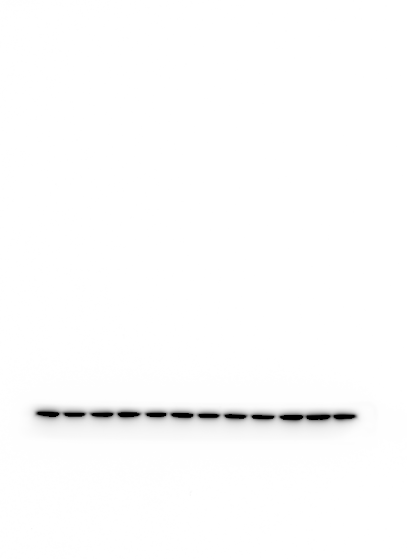

Supplement: Supplementary file 1 [file fc036d12c9057da5bdf9cd30.docx]
